# Supplementary material
Source: PubMed Central journal article supplement (PMC2084295)
Supplement: pnas_0708600104_3.pdf [file pnas_0708600104_3.pdf]

**Table 1. Results of bulk, steady-state FRET distance measurements compared to the mean distance measured in single molecule experiments**

| Experiment <sup>1</sup> | Steady-state FRET | Mean single-molecule |
|-------------------------|-------------------|----------------------|
| Substrate-free AK       | $0.95 \pm 0.02$   | $0.92 \pm 0.02$      |
| AK with AMP-PNP/AMP     | $0.83 \pm 0.05$   | $0.84 \pm 0.01$      |
| Difference              | $0.12 \pm 0.05$   | $0.08 \pm 0.03$      |

Units are in relative distance,  $R/R_0$ , where  $R_0$  is the Förster radius at which donor–acceptor distance the transfer efficiency is 50%.

<sup>1</sup> ?/Au: Please confirm “Experiment” as an appropriate heading or provide another.
