# Supplementary material
Source: PubMed Central journal article supplement (PMC2084295)
Supplement: pnas_0708600104_4.pdf [file pnas_0708600104_4.pdf]

**Table 2. Numerical results from global fitting of two-state motional-narrowing model to single-molecule probability distributions**

| Variable <sup>1</sup> | Substrate-free AK           | AK + AMP – PNP/AMP           |
|-----------------------|-----------------------------|------------------------------|
| $k_{\text{open}}$     | $120 \pm 40 \text{ s}^{-1}$ | $160 \pm 40 \text{ s}^{-1}$  |
| $k_{\text{close}}$    | $220 \pm 70 \text{ s}^{-1}$ | $440 \pm 110 \text{ s}^{-1}$ |
| $a$                   | $0.45 \pm 0.02$             | $0.42 \pm 0.04$              |
| $b$                   | $0.76 \pm 0.01$             | $0.73 \pm 0.01$              |
| $\sigma_{0.15}$       | $0.24 \pm 0.10$             | $0.13 \pm 0.02$              |
| $\sigma_{0.14}$       | $0.25 \pm 0.03$             | $0.14 \pm 0.01$              |
| $\sigma_{0.13}$       | $0.25 \pm 0.03$             | $0.18 \pm 0.01$              |
| $\sigma_{0.12}$       | $0.26 \pm 0.03$             | $0.20 \pm 0.01$              |
| $\sigma_{0.11}$       | $0.28 \pm 0.03$             | $0.22 \pm 0.01$              |
| $\sigma_{0.10}$       | $0.28 \pm 0.02$             | $0.23 \pm 0.01$              |
| $\sigma_{0.09}$       | $0.27 \pm 0.03$             | $0.24 \pm 0.01$              |
| $\sigma_{0.08}$       | $0.29 \pm 0.04$             | $0.25 \pm 0.02$              |
| $\sigma_{0.07}$       | $0.29 \pm 0.04$             | $0.26 \pm 0.02$              |

<sup>1</sup> ?/Au: Please confirm “Variable” as an appropriate heading or provide another.
