# Supplementary material
Source: PubMed Central journal article supplement (PMC2084295)
Supplement: pnas_0708600104_5.pdf [file pnas_0708600104_5.pdf]

**Table 3. Numerical fitting results of random bi–bi model to kinetic data for AK reverse reaction for both the his-tagged mutant AK (mutant) used in single molecule experiments and the untagged wild-type (Wt) protein**

| Constant <sup>1</sup> | Mutant                          | Wt                               |
|-----------------------|---------------------------------|----------------------------------|
| $k_{\text{cat}}$      | $170 \pm 20 \text{ s}^{-1}$     | $210 \pm 20 \text{ s}^{-1}$      |
| $K_{\text{D,ADP}}$    | $154 \pm 7 \text{ }\mu\text{M}$ | $150 \pm 10 \text{ }\mu\text{M}$ |
| $K_{\text{D,MgADP}}$  | $19 \pm 2 \text{ }\mu\text{M}$  | $12 \pm 4 \text{ }\mu\text{M}$   |

---

<sup>1</sup> ?/Au: Please confirm “Constant” as an appropriate heading or provide another.
