# Supplementary material
Source: PubMed Central journal article supplement (PMC2084295)
Supplement: pnas_0708600104_6.pdf [file pnas_0708600104_6.pdf]

**Table 4. Numerical Results of fitting a kinetic model incorporating the Lid-opening conformational change as the mechanistic rate-limiting step to bulk enzymatic turnover data for the His-tagged mutant AK used in single molecule experiments**

| <b>Constant<sup>1</sup></b>    | <b>Mutant protein</b>      |
|--------------------------------|----------------------------|
| $K_{\text{Mg}\cdot\text{ADP}}$ | $140 \pm 30 \mu\text{M}$   |
| $K_{\text{ADP}}$               | $17.8 \pm 0.5 \mu\text{M}$ |

---

<sup>1</sup> ?/Au: Please confirm “Constant” as an appropriate heading or provide another.
