# Supplementary material
Source: PubMed Central journal article supplement (PMC2084295)
Supplement: pnas_0708600104_7.pdf [file pnas_0708600104_7.pdf]

**Table 5. Steady state Anisotropy values for free dyes and doubly labeled FRET mutant**

| Anisotropy | Free dye          | Doubly labeled protein<br>w/donor excitation |
|------------|-------------------|----------------------------------------------|
| Donor      | $0.202 \pm 0.002$ | $0.252 \pm 0.019$                            |
| Acceptor   | $0.128 \pm 0.006$ | $0.047 \pm 0.021$                            |

Free dye was directly excited at 500 or 600 nM for donor or acceptor respectively. Protein sample was excited at 500 nM and anisotropy values were calculated for emission from either dye.
