# Supplementary material
Source: PubMed Central journal article supplement (PMC2084295)
Supplement: pnas_0708600104_8.pdf [file pnas_0708600104_8.pdf]

**Table 6. Information about effect of variable  $\alpha$  on the single-molecule data sets**

| $\alpha$ | Substrate-free AK*    |                               | AK with AMP-PNP/AMP <sup>†</sup> |                               |
|----------|-----------------------|-------------------------------|----------------------------------|-------------------------------|
|          | $T_{\text{avg}}$ , ms | No. of $\hat{x}$ measurements | $T_{\text{avg}}$ , ms            | No. of $\hat{x}$ measurements |
| 0.07     | 8.6                   | $7.47 \times 10^4$            | 6.9                              | $5.91 \times 10^4$            |
| 0.08     | 6.7                   | $9.52 \times 10^4$            | 5.5                              | $7.52 \times 10^4$            |
| 0.09     | 5.5                   | $1.17 \times 10^5$            | 4.4                              | $9.27 \times 10^4$            |
| 0.10     | 4.5                   | $1.41 \times 10^5$            | 3.7                              | $1.11 \times 10^5$            |
| 0.11     | 3.9                   | $1.65 \times 10^5$            | 3.2                              | $1.30 \times 10^5$            |
| 0.12     | 3.4                   | $1.90 \times 10^5$            | 2.7                              | $1.50 \times 10^5$            |
| 0.13     | 2.8                   | $2.32 \times 10^5$            | 2.4                              | $1.70 \times 10^5$            |
| 0.14     | 2.5                   | $2.60 \times 10^5$            | 2.2                              | $1.90 \times 10^5$            |
| 0.15     | 2.2                   | $2.88 \times 10^5$            | 1.9                              | $2.11 \times 10^5$            |

\*No. of molecules, 419 (645 s).

<sup>†</sup>No. of molecules, 344 (413 s).
