# Supplementary material
Source: PubMed Central journal article supplement (PMC2084295)

Fixed ADP Experiments

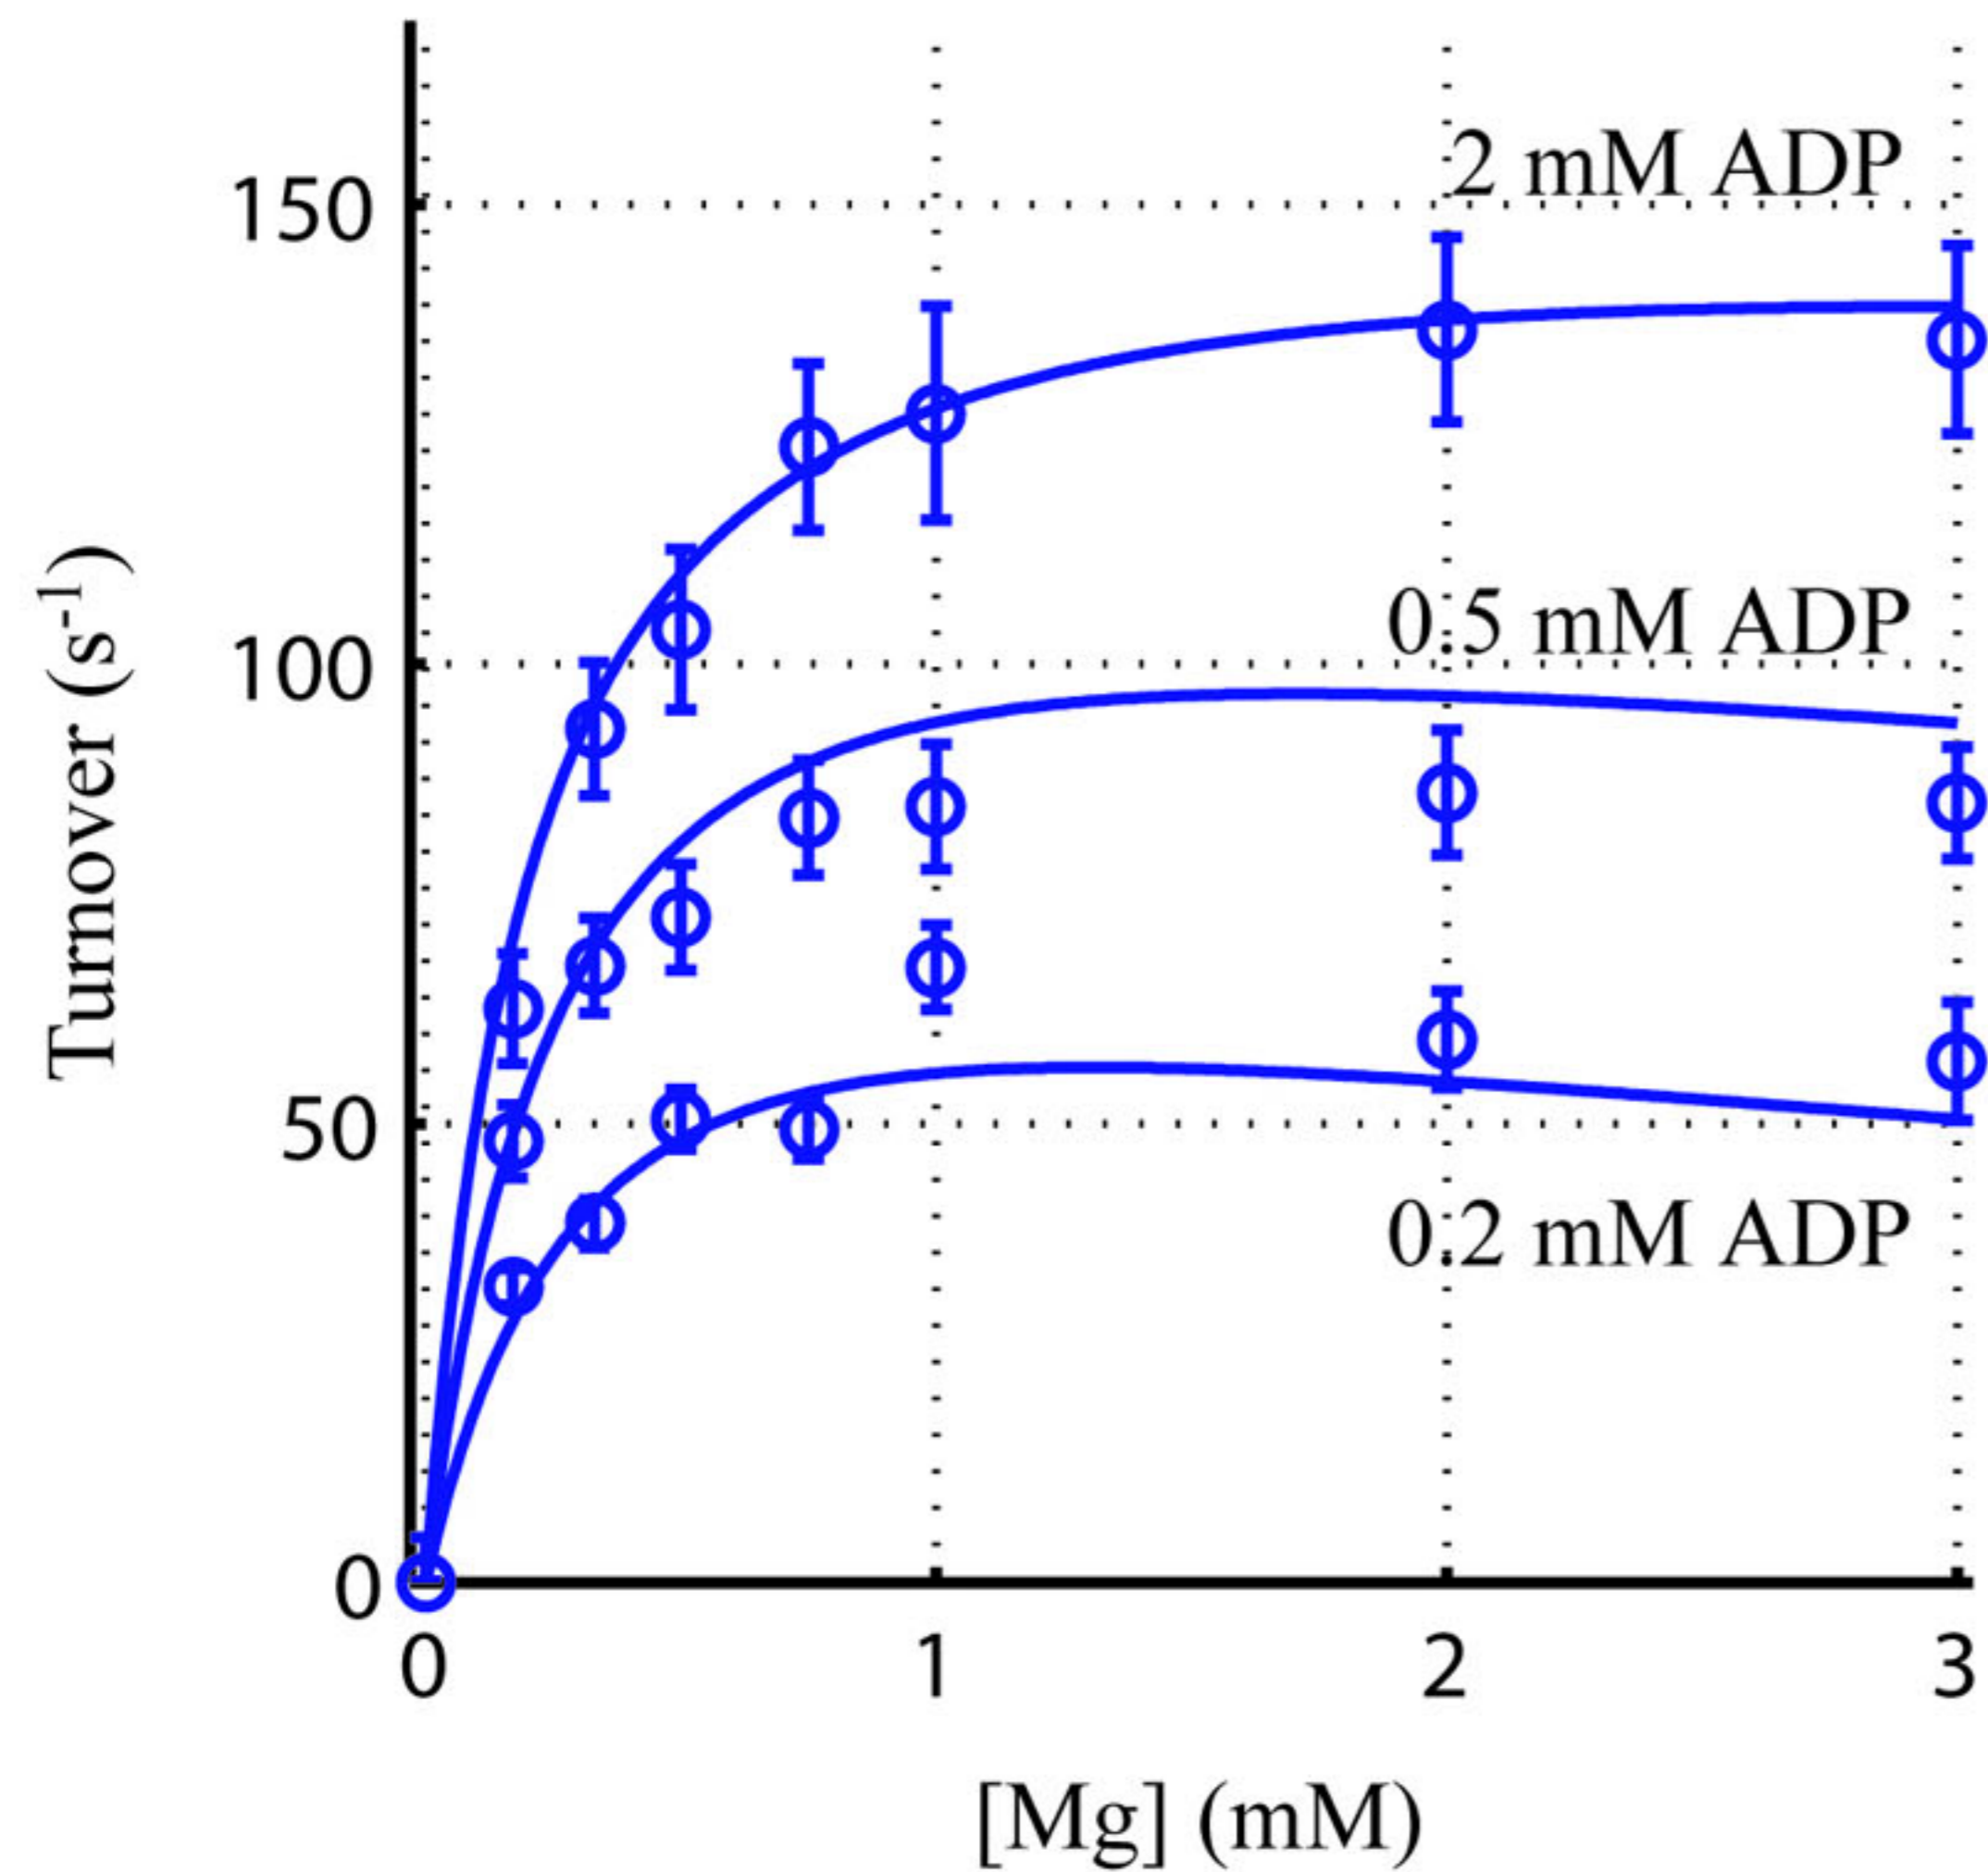

Fixed Mg Experiments

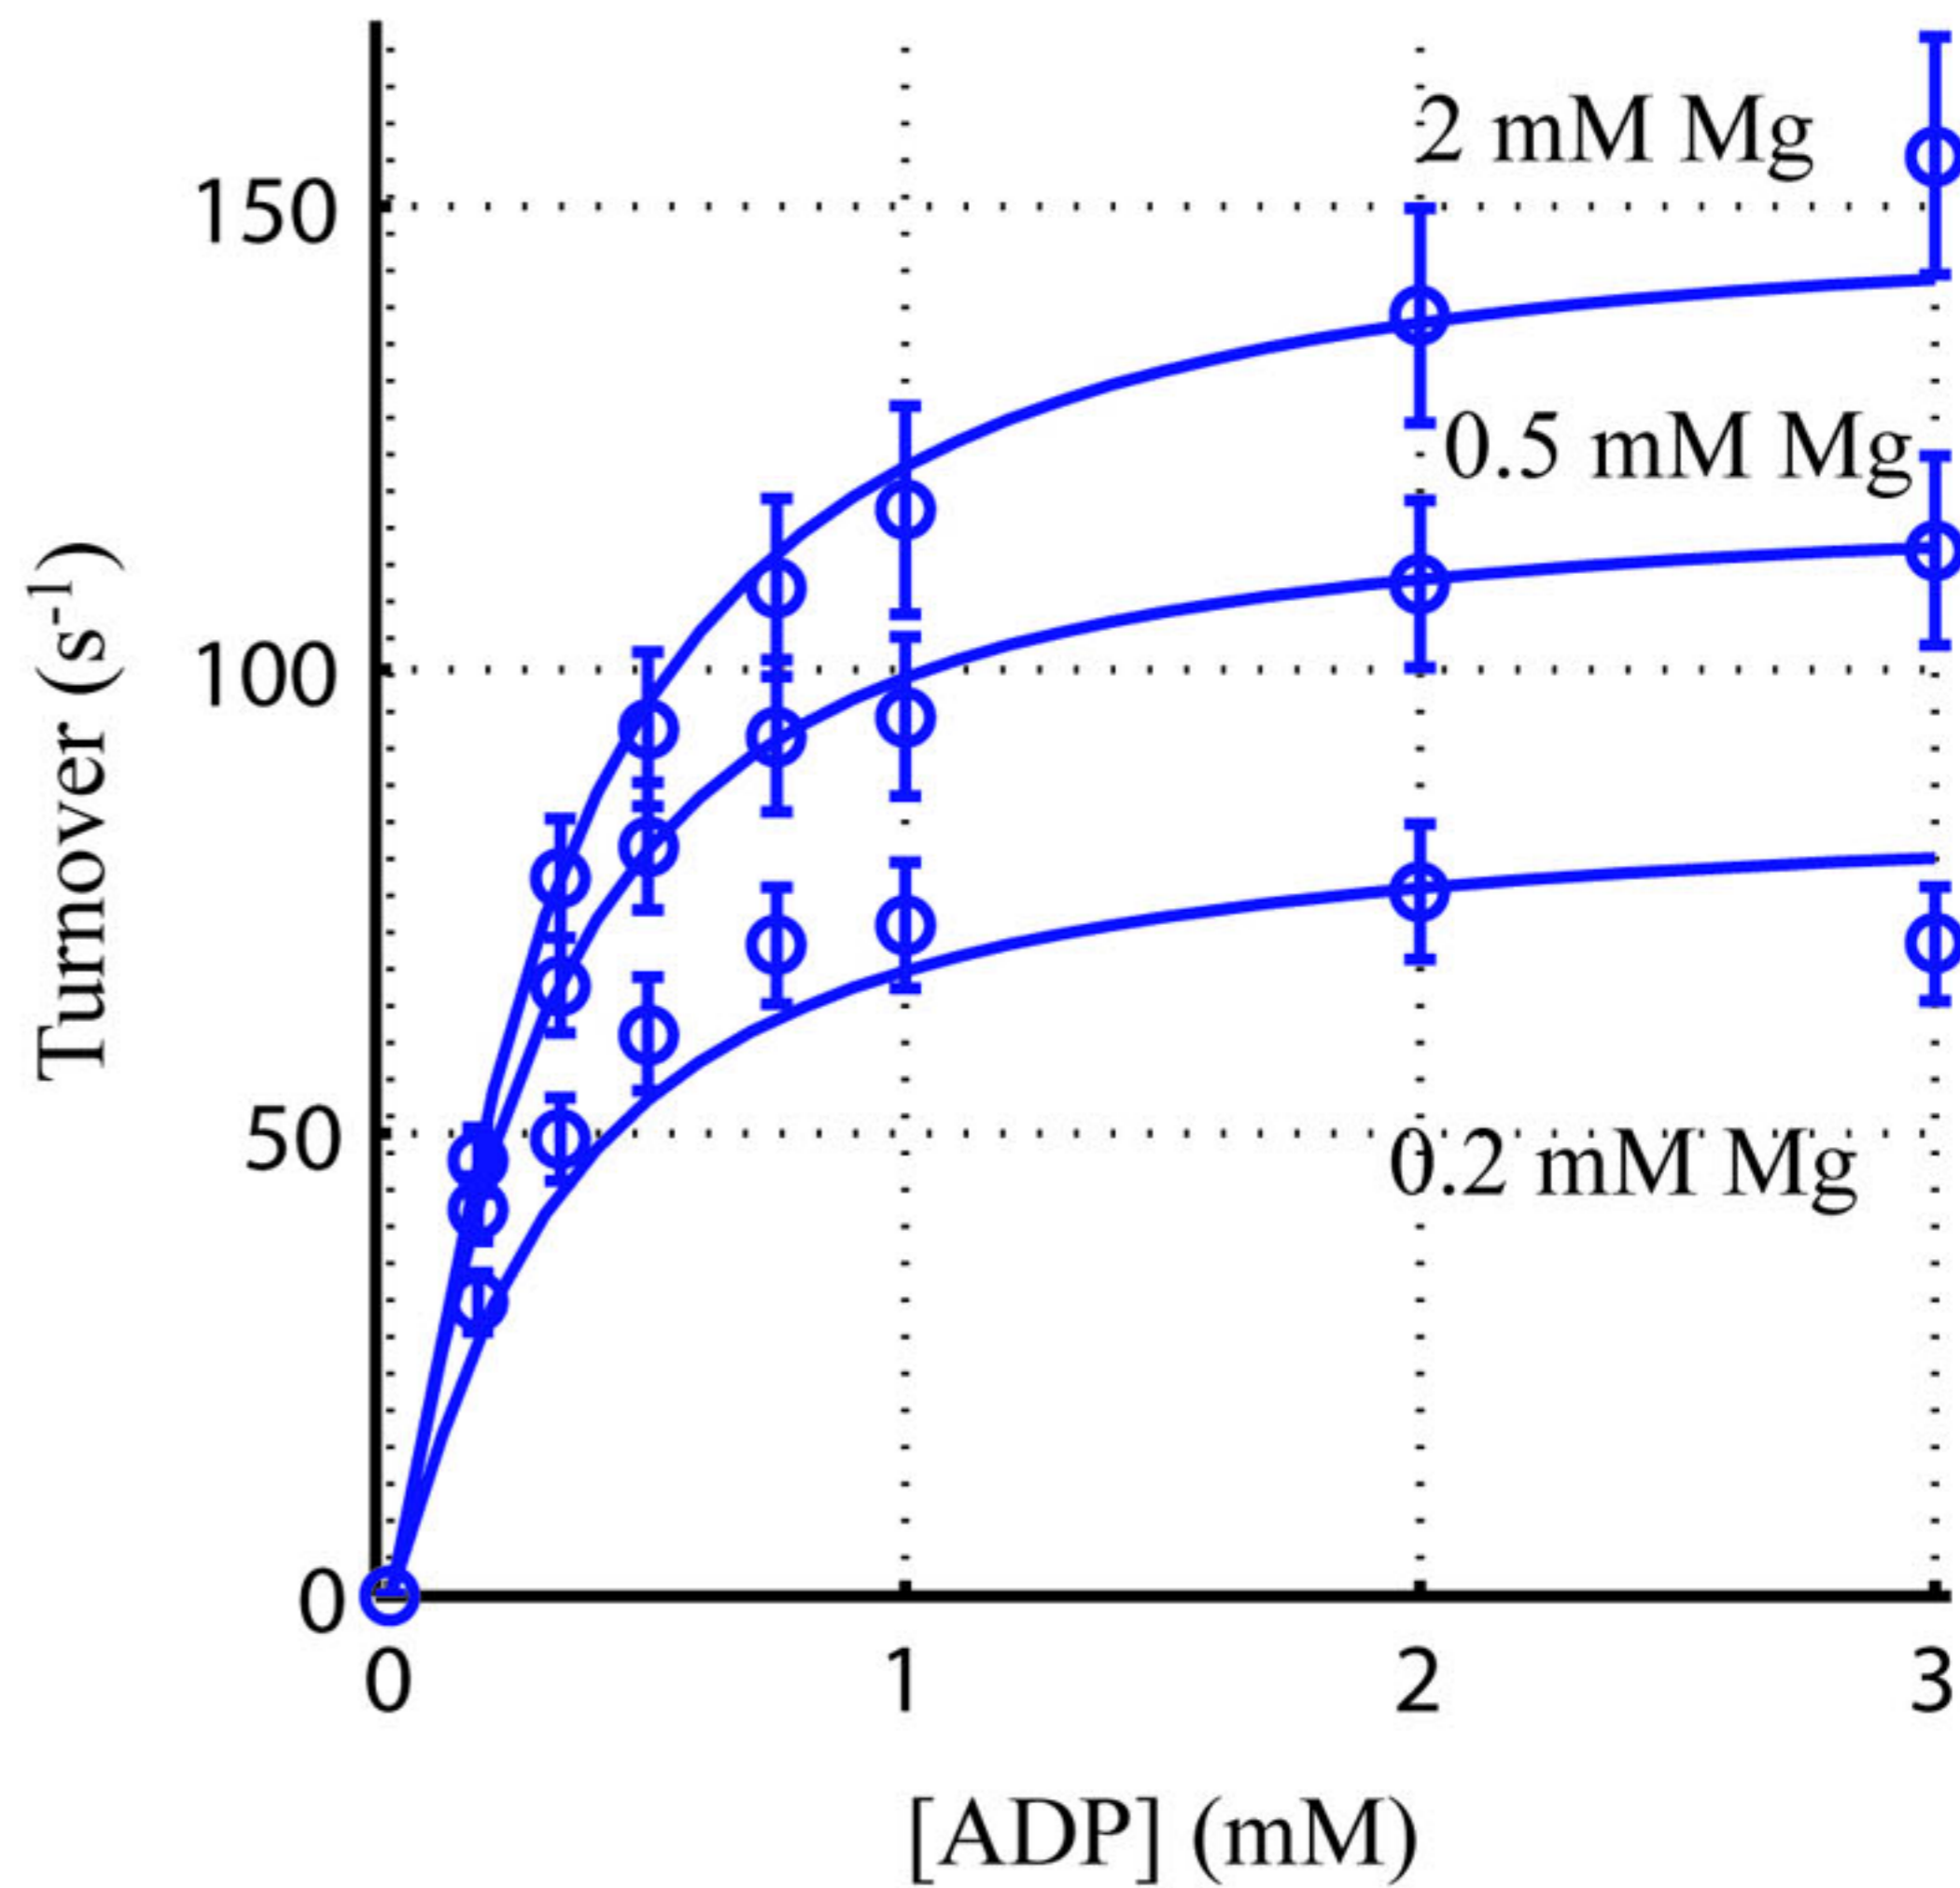

Supplement: pnas_0708600104_2.pdf [file pnas_0708600104_2.pdf]
